# Supplementary material
Source: Springer Nature journal article supplement (https://www.springermedizin.de/resource/supplementary/12950_2010_185_MOESM2_ESM.pdf/9558234)

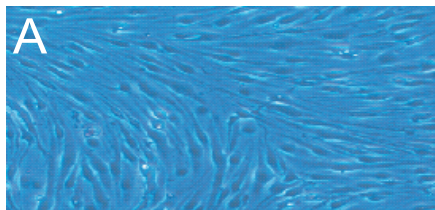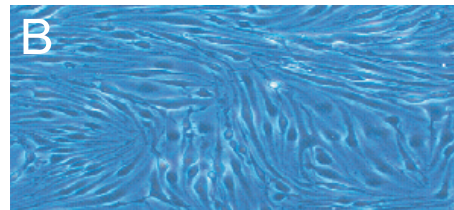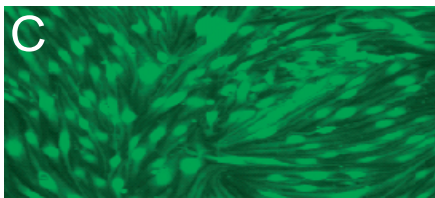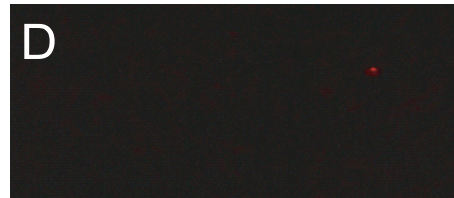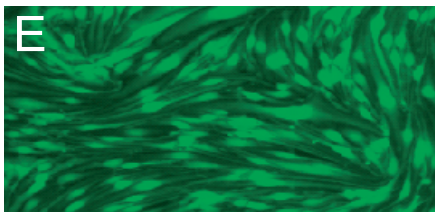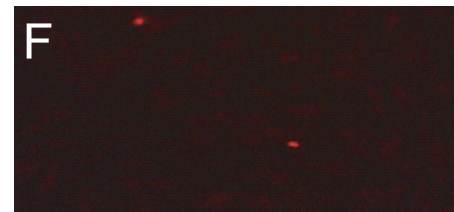

**G**

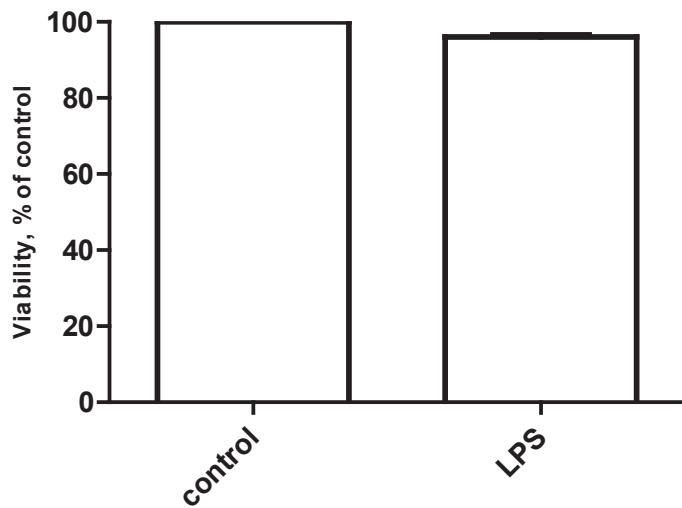

**H**

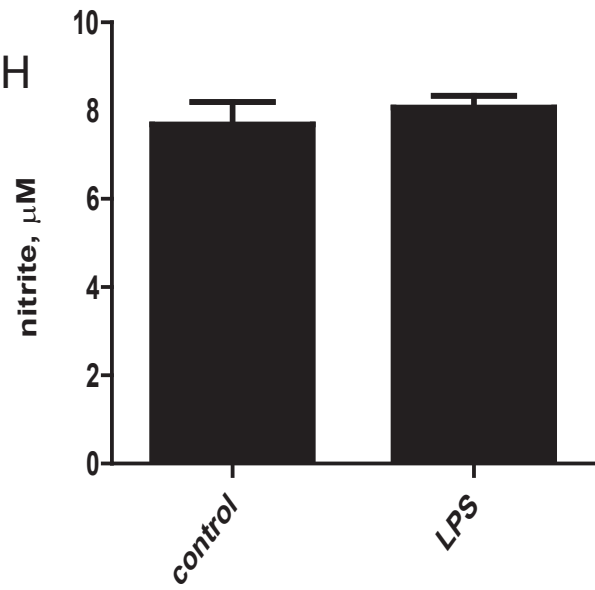

Supplement: MOESM2 [file 9558234]
